# Supplementary material for: Historical translocations and stocking alter the genetic structure of a Mediterranean lobster fishery
Source: PubMed Central journal article supplement (PMC7319110; doi:10.1002/ece3.6304), 2020-04-28

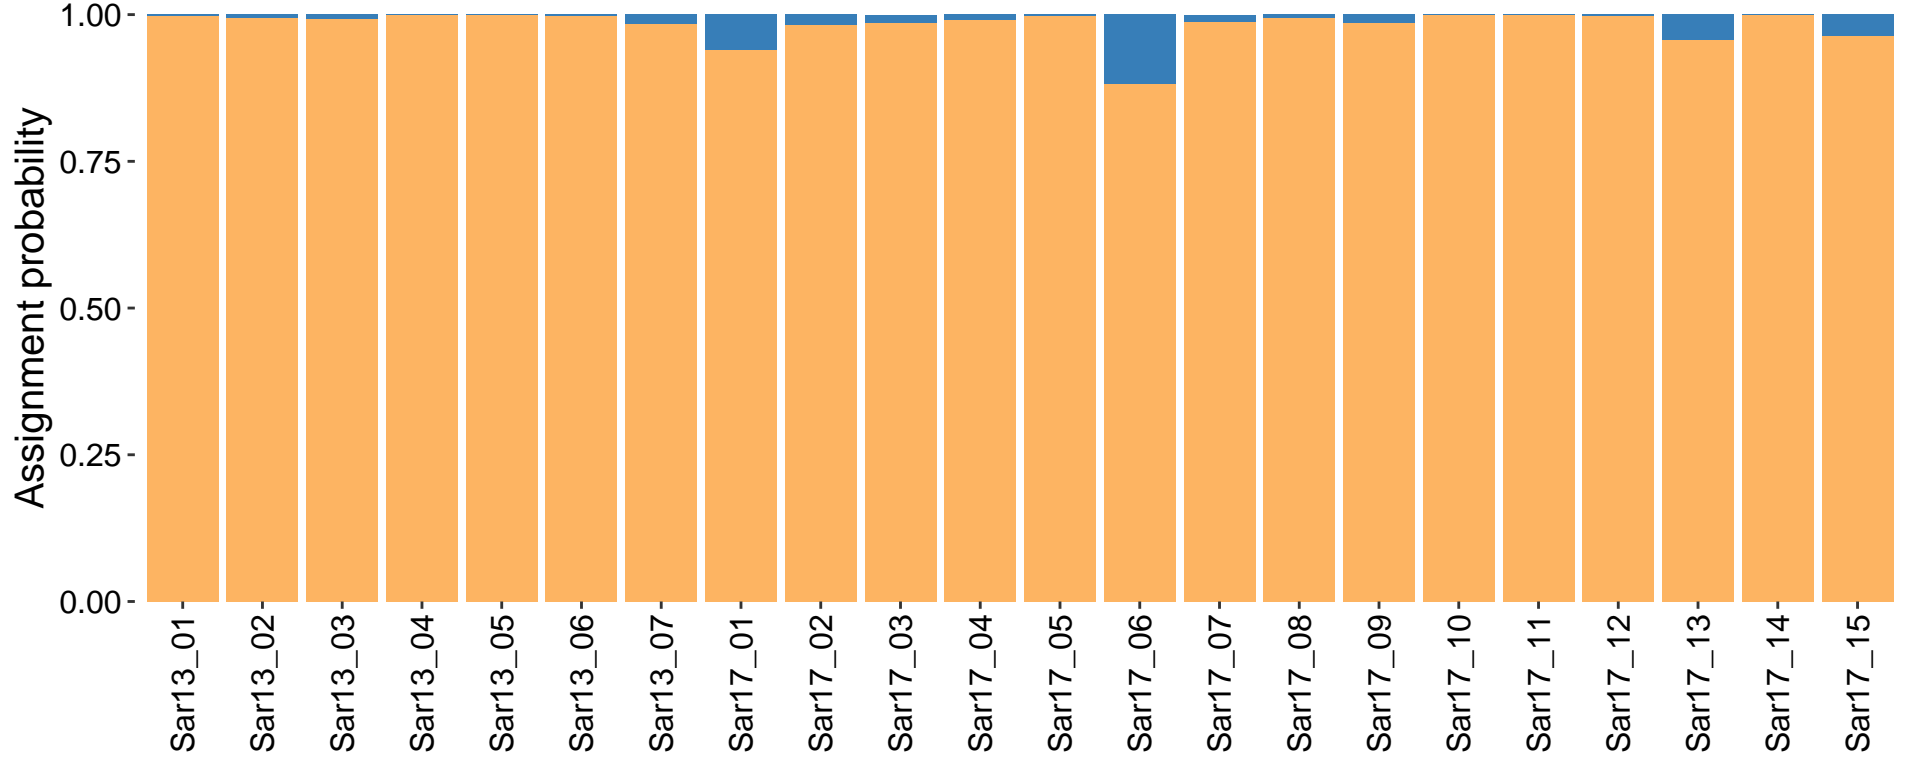

Supplement: ECE3-10-5631-s002.pdf [file ECE3-10-5631-s002.pdf]
